# Supplementary material for: Differential Allocation to Photosynthetic and Non-Photosynthetic Nitrogen Fractions among Native and Invasive Species
Source: PubMed Central journal article supplement (PMC3659119; doi:10.1371/journal.pone.0064502), 2013-05-20
Supplement: pone.0064502.s001.pdf [file pone.0064502.s001.pdf]

**Table S1** – Trait values for five native and five invasive species grown at 300  $\mu\text{mol photon m}^{-2} \text{s}^{-1}$  and high nutrient availability. Values are means with SE in parentheses. Trait values not connected by the same letter (A-F) are statistically different at  $P < 0.05$ . ANOVA results are presented in Table 2 in the manuscript. Species and trait abbreviations are provided below. Sample sizes for each species (n) are provided next to species names. (NA) denotes no data collected. <sup>l</sup> denotes legume.

|                    | Native species             |                    |                   |                     |                            | Invasive species           |                            |                    |                   |                    |
|--------------------|----------------------------|--------------------|-------------------|---------------------|----------------------------|----------------------------|----------------------------|--------------------|-------------------|--------------------|
|                    | acko <sup>l</sup><br>(n=6) | dovi<br>(n=6)      | osan<br>(n=6)     | pial<br>(n=3)       | soch <sup>l</sup><br>(n=6) | famo <sup>l</sup><br>(n=6) | lele <sup>l</sup><br>(n=6) | psca<br>(n=6)      | pyan<br>(n=6)     | scte<br>(n=3)      |
| A <sub>area</sub>  | 14.3 (1.4)<br>AB           | 10.9 (0.8)<br>ABC  | 17.5 (1.6)<br>A   | 10.5 (1.6)<br>ABC   | 9.4 (1.5)<br>BC            | 10.1 (1.1)<br>BC           | 13.6 (1.7)<br>AB           | 7.0 (0.7)<br>C     | 13.4 (1.3)<br>AB  | 8.3 (0.9)<br>BC    |
| A <sub>mass</sub>  | 388 (59)<br>AB             | 132 (16)<br>D      | 269 (34)<br>BCD   | 384 (17)<br>ABC     | 214 (73)<br>CD             | 272 (47)<br>BCD            | 464 (56)<br>A              | 134 (16)<br>D      | 465 (116)<br>A    | 139 (26)<br>CD     |
| V <sub>max</sub>   | 113 (10)<br>A              | 98.6 (10.0)<br>AB  | 120 (7)<br>A      | 66.3 (0.1)<br>ABC   | 106 (17)<br>AB             | 92.1 (12.1)<br>AB          | 116 (13)<br>A              | 48.6 (4.0)<br>C    | 77.8 (4.2)<br>ABC | 58.8 (7.3)<br>BC   |
| J <sub>max</sub>   | 187 (20)<br>AB             | 131 (9)<br>BC      | 229 (23)<br>A     | 108 (3)<br>BC       | 209 (29)<br>AB             | 134 (16)<br>BC             | 155 (22)<br>ABC            | 104 (5)<br>C       | 148 (11)<br>ABC   | 114 (13)<br>BC     |
| $\Phi\text{PSII}$  | 0.27 (0.03)<br>A           | 0.25 (0.02)<br>AB  | 0.26 (0.02)<br>A  | 0.19 (0.02)<br>AB   | 0.17 (0.03)<br>AB          | 0.25 (0.02)<br>AB          | 0.27 (0.03)<br>A           | 0.15 (0.02)<br>B   | 0.23 (0.02)<br>AB | 0.15 (0.02)<br>AB  |
| C <sub>i</sub>     | 200 (11)<br>A              | 192 (8)<br>A       | 223 (15)<br>A     | 212 (26)<br>A       | 188 (17)<br>A              | 210 (13)<br>A              | 195 (23)<br>A              | 215 (15)<br>A      | 255 (14)<br>A     | 232 (21)<br>A      |
| N <sub>area</sub>  | 2.36 (0.45)<br>A           | 2.32 (0.37)<br>A   | 1.48 (0.09)<br>AB | 0.86 (0.07)<br>B    | 1.56 (0.11)<br>AB          | 1.53 (0.19)<br>AB          | 1.38 (0.04)<br>AB          | 1.60 (0.09)<br>AB  | 1.03 (0.13)<br>B  | 1.17 (0.10)<br>B   |
| N <sub>mass</sub>  | 58.5 (4.0)<br>A            | 26.3 (1.4)<br>DEF  | 22.6 (2.0)<br>EF  | 31.7 (0.7)<br>BCDEF | 31.9 (2.9)<br>CD           | 37.7 (2.1)<br>BC           | 47.1 (2.4)<br>AB           | 29.9 (1.0)<br>CDE  | 30.5 (0.8)<br>CDE | 19.6 (3.3)<br>F    |
| PNUE               | 99.6 (19.4)<br>ABCD        | 72.3 (10.1)<br>CD  | 168 (19)<br>AB    | 170 (12)<br>ABCD    | 87.9 (20.6)<br>BCD         | 103 (20)<br>ABCD           | 139 (18)<br>ABC            | 62.1 (6.3)<br>D    | 215 (54)<br>A     | 99.0 (3.9)<br>ABCD |
| LMA                | 40.7 (5.8)<br>BCDE         | 87.4 (11.0)<br>A   | 66.6 (3.2)<br>AB  | 27.3 (2.9)<br>CDE   | 52.3 (7.3)<br>BCDE         | 40.5 (4.3)<br>BCDE         | 29.4 (1.0)<br>E            | 53.6 (2.7)<br>ABCD | 33.8 (4.2)<br>DE  | 64.0 (12.4)<br>ABC |
| P <sub>sol</sub>   | 25.3 (2.8)<br>A            | 7.0 (2.8)<br>CDE   | 4.2 (1.2)<br>DE   | 12.0 (0.1)<br>ABCD  | 7.9 (1.9)<br>CDE           | 20.0 (2.3)<br>AB           | 15.6 (2.4)<br>ABC          | 8.6 (1.0)<br>BCD   | 6.7 (0.7)<br>CDE  | 2.3 (1.2)<br>E     |
| P <sub>mem</sub>   | 13.4 (1.8)<br>A            | 14.6 (2.2)<br>A    | 7.8 (0.9)<br>AB   | 14.3 (2.4)<br>A     | 8.0 (1.0)<br>AB            | 11.8 (3.6)<br>A            | 14.6 (2.1)<br>A            | 7.0 (0.6)<br>AB    | 9.1 (1.7)<br>AB   | 2.8 (0.8)<br>B     |
| P <sub>cw</sub>    | 2.11 (0.36)<br>AB          | 2.66 (0.46)<br>A   | 2.03 (0.25)<br>AB | 2.92 (0.76)<br>A    | 1.38 (0.22)<br>BC          | 2.86 (0.69)<br>A           | 2.06 (0.22)<br>AB          | 1.32 (0.13)<br>BC  | 1.36 (0.26)<br>BC | 0.94 (0.23)<br>C   |
| A/P <sub>sol</sub> | 19.0 (5.5)<br>BCD          | 30.5 (6.9)<br>ABCD | 94.1 (23.5)<br>A  | 32.0 (1.7)<br>ABCD  | 32.6 (9.0)<br>ABCD         | 15.1 (3.3)<br>D            | 34.4 (7.5)<br>ABCD         | 16.5 (2.4)<br>BD   | 75.3 (23.6)<br>AC | 83.4 (23.5)<br>ABC |

|                   |                   |                    |                    |                     |                    |                   |                   |                    |                    |                   |
|-------------------|-------------------|--------------------|--------------------|---------------------|--------------------|-------------------|-------------------|--------------------|--------------------|-------------------|
| $P_{sol}/P_{mem}$ | 2.16 (0.45)<br>AB | 0.50 (0.18)<br>C   | 0.56 (0.16)<br>C   | 0.86 (0.15)<br>BC   | 0.94 (0.15)<br>C   | 2.48 (0.75)<br>A  | 1.24 (0.30)<br>BC | 1.28 (0.19)<br>BC  | 0.89 (0.22)<br>C   | 0.75 (0.19)<br>C  |
| TNA               | 3.71 (0.34)<br>AB | 1.35 (0.20)<br>DE  | 1.33 (0.17)<br>DE  | 3.91 (0.80)<br>AB   | 1.68 (0.28)<br>CDE | 5.14 (0.45)<br>A  | 2.88 (0.54)<br>BC | 23.9 (0.14)<br>BCD | 1.20 (0.25)<br>EF  | 0.50 (0.17)<br>F  |
| AA                | 2.07 (0.36)<br>A  | 0.33 (0.08)<br>CD  | 0.52 (0.11)<br>C   | 0.51 (0.26)<br>BCD  | 0.47 (0.07)<br>CD  | 1.07 (0.14)<br>AB | 1.42 (0.16)<br>A  | 1.72 (0.19)<br>A   | 0.22 (0.02)<br>D   | 0.24 (0.04)<br>CD |
| $NH_4^+$          | 0.05 (0.01)<br>DE | 0.18 (0.02)<br>ABC | 0.07 (0.02)<br>CDE | 0.17 (0.01)<br>ABCD | 0.06 (0.01)<br>DE  | 0.03 (0.01)<br>E  | 0.07 (0.02)<br>DE | 0.38 (0.05)<br>A   | 0.13 (0.01)<br>BCD | 0.44 (0.19)<br>AB |
| $NO_3^-$          | 0.23 (0.03)<br>BC | 0.20 (0.03)<br>BC  | 0.18 (0.03)<br>BC  | 0.38 (0.04)<br>ABC  | 0.80 (0.58)<br>ABC | 0.15 (0.06)<br>C  | 1.17 (0.21)<br>A  | 0.37 (0.06)<br>AB  | 0.23 (0.03)<br>BC  | 0.16 (0.06)<br>BC |
| Chl               | NA                | 9.4 (0.7)<br>ABC   | 8.3 (0.2)<br>C     | 15.1 (2.0)<br>AB    | 8.2 (0.8)<br>AB    | 10.7 (0.7)<br>AB  | 10.2 (0.6)<br>A   | 8.8 (0.5)<br>A     | 9.4 (0.4)<br>ABC   | 8.3 (0.8)<br>BC   |

Trait abbreviations:  $A_{area}$ , photosynthetic rate ( $\mu\text{mol CO}_2 \text{ m}^{-2} \text{ leaf s}^{-1}$ );  $A_{mass}$ , photosynthetic rate ( $\text{nmol g}^{-1} \text{ s}^{-1}$ );  $V_{max}$ , maximum rate of carboxylation ( $\mu\text{mol CO}_2 \text{ m}^{-2} \text{ leaf s}^{-1}$ );  $J_{max}$ , maximum electron transport rate ( $\mu\text{mol electrons m}^{-2} \text{ s}^{-1}$ );  $\Phi_{PSII}$ , effective quantum yield of PSII, ( $\Delta F/F_m'$ );  $c_i$ , internal  $\text{CO}_2$  concentration (ppm);  $N_{area}$ , leaf N ( $\text{g N m}^{-2}$ );  $N_{mass}$ , leaf N ( $\text{mg N g}^{-1}$ ); PNUE, photosynthetic nitrogen use efficiency ( $\mu\text{mol CO}_2 \text{ mol}^{-1} \text{ N s}^{-1}$ ); LMA, leaf mass per area ( $\text{g m}^{-2}$ );  $P_{sol}$ , soluble protein ( $\text{mg N g}^{-1}$ );  $P_{mem}$ , membrane-bound protein ( $\text{mg N g}^{-1}$ );  $P_{cw}$ , cell wall protein ( $\text{mg N g}^{-1}$ ); AA, amino acid ( $\text{mg N g}^{-1}$ ); TNA, total nucleic acid ( $\text{mg N g}^{-1}$ );  $NH_4^+$ , ammonium ( $\text{mg N g}^{-1}$ );  $NO_3^-$ , nitrate ( $\text{mg N g}^{-1}$ ); Chl, Chlorophyll A +B ( $\mu\text{g g}^{-1}$ ).

Species abbreviations are: *Acacia koa* (acko), *Dodonaea viscosa* (dovi), *Falcataria moluccana* (famo), *Leucaena leucocephala* (lele), *Osteomeles anthyllidifolia* (osan), *Pipturus albidus* (pial), *Psidium cattleianum* (psca), *Pyracantha angustifolia* (pyan), *Schinus terebinthifolius* (scte), and *Sophora chrysophylla* (soch).
