# Supplementary material for: Differential Allocation to Photosynthetic and Non-Photosynthetic Nitrogen Fractions among Native and Invasive Species
Source: PubMed Central journal article supplement (PMC3659119; doi:10.1371/journal.pone.0064502), 2013-05-20

### Results S1 – Nitrogen recovery in biochemical fractions

Across species, we recovered most of total leaf N in our seven fractions (soluble protein, membrane-bound protein, cell-wall protein, total nucleic acid, amino acid,  $\text{NH}_4^+$ , and  $\text{NO}_3^-$ ). When we compared total leaf N concentration measured with an elemental analyzer (EA) with the sum of seven N fractions (fractions), the relationship was nearly 1:1 (see Figure below). Recovery varied across species (see Table below) with three species approaching 100% recovery and three species less than 70% recovery. Recovery did not vary in any systematic way. Recovery was not significantly different between invasive (72.3%) and native (84.7%) species groups ( $t = 2.36$ ,  $P = 0.42$ ) or between legume (83.3) and non-legume (75.3) species ( $t = 2.31$ ,  $P = 0.59$ ). Low N fraction recovery could be due to the presence of nitrogenous compounds not measured (e.g., alkaloids). For consistency across the results, we present the percentage of leaf N allocated to various N fractions using the value obtained by summing our seven fractions rather than that obtained by elemental analysis. Throughout, we use the term ‘concentration’ to refer to a parameter expressed per unit dry mass and ‘content per area’ for the area basis.

| Species                           | % N (EA) | % N (fractions) | % Recovery |
|-----------------------------------|----------|-----------------|------------|
| <i>Acacia koa</i>                 | 5.85     | 4.69            | 80.2       |
| <i>Dodonaea viscosa</i>           | 2.63     | 2.63            | 100.1      |
| <i>Falcataria moluccana</i> *     | 3.77     | 4.10            | 108.9      |
| <i>Leucaena leucocephala</i> *    | 4.71     | 3.78            | 80.2       |
| <i>Osteomeles anthyllidifolia</i> | 2.26     | 1.61            | 71.4       |
| <i>Pipturus albidus</i>           | 3.17     | 3.42            | 107.9      |
| <i>Psidium cattleianum</i> *      | 2.99     | 2.17            | 72.7       |
| <i>Pyracantha angustifolia</i> *  | 3.05     | 1.89            | 61.9       |
| <i>Schinus terebinthifolius</i> * | 1.96     | 0.74            | 37.9       |
| <i>Sophora chrysophylla</i>       | 3.19     | 2.04            | 63.7       |

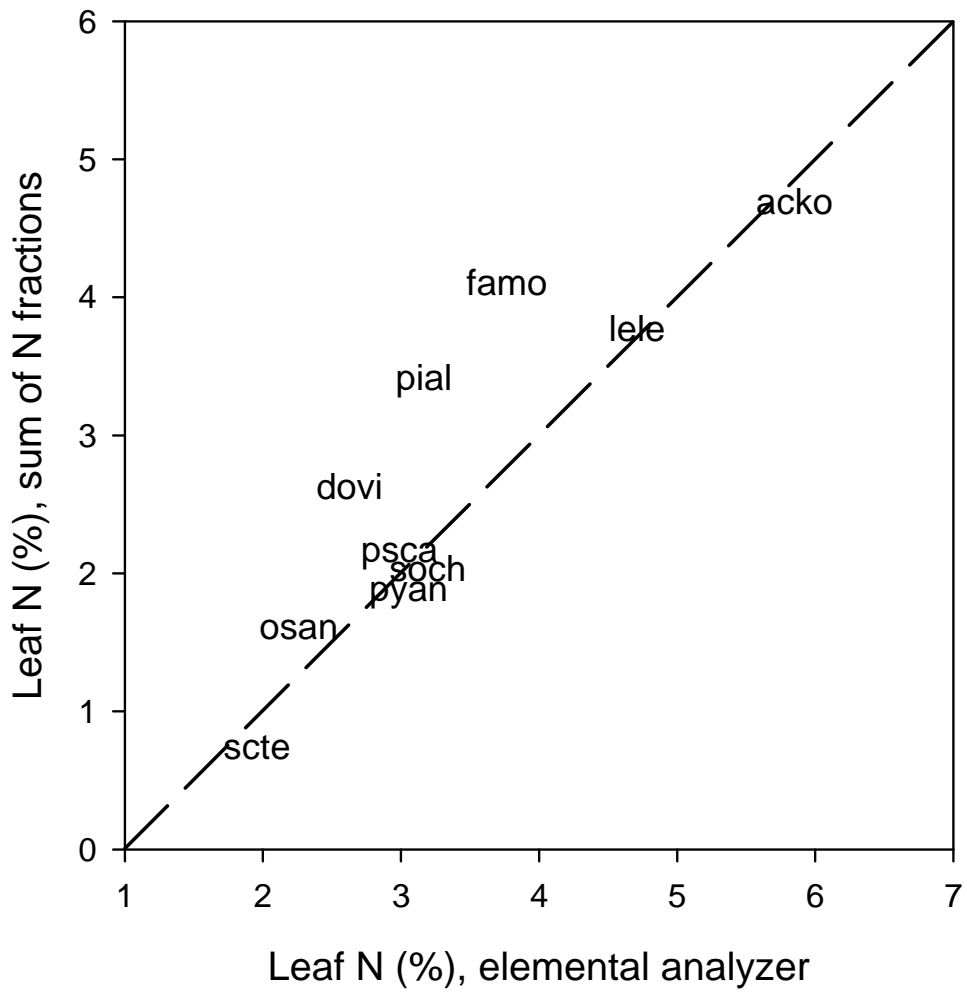

Supplement: pone.0064502.s003.pdf [file pone.0064502.s003.pdf]
